# Supplementary material
Source: PubMed Central journal article supplement (PMC3190872)
Supplement: supp_M110.206680_jbc.M110.206680-1.pdf [file supp_M110.206680_jbc.M110.206680-1.pdf]

## SUPPLEMENTAL MATERIAL

### THE NON-CANONICAL PROTEIN BINDING SITE AT THE MONOMER-MONOMER INTERFACE OF YEAST PCNA REGULATES THE REV1-PCNA INTERACTION AND POL $\zeta$ /REV1-DEPENDENT TRANSLESION DNA SYNTHESIS

Neeru M. Sharma, Olga V. Kochenova and Polina V. Shcherbakova

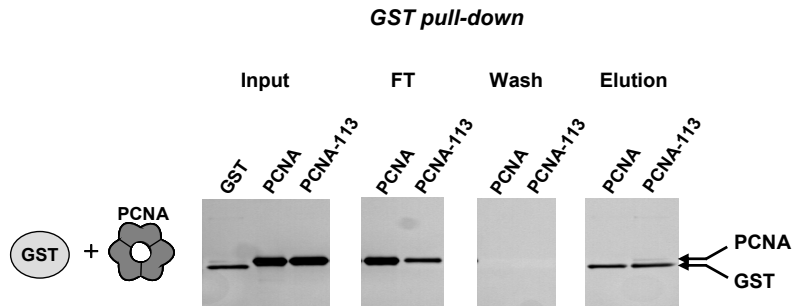

FIGURE S1. **PCNA or PCNA-113 do not bind to GST in the pull-down assay.** Purified GST was incubated with PCNA and glutathione-Sepharose beads and washed extensively. The bound proteins were eluted with SDS sample buffer, separated by electrophoresis in 4-12% SDS-polyacrylamide gel and detected by silver staining. FT, flow-through fraction.

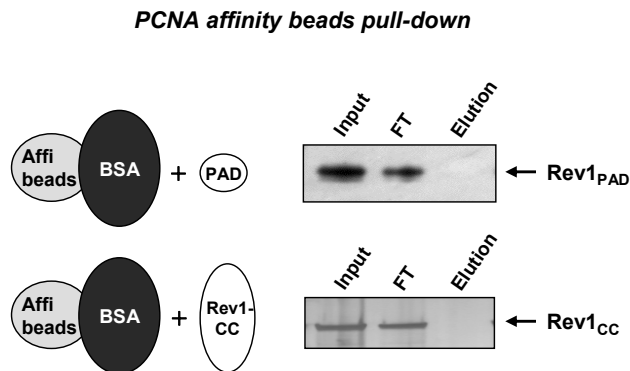

FIGURE S2. **Rev1-PAD or Rev1-CC do not bind to bovine serum albumin (BSA) affinity beads.** BSA (4 mg) was coupled to Affi-Gel 15 beads as described in Experimental Procedures for PCNA. The BSA affinity beads were incubated with the purified Rev1 fragments and then washed extensively. Bound proteins were eluted with SDS sample buffer, separated by electrophoresis in 4-12% SDS-polyacrylamide gel and detected by silver staining. FT, flow-through fraction.
